# Supplementary material
Source: PubMed Central journal article supplement (PMC4793990)
Supplement: balm021840.w1_default.pdf [file balm021840.w1_default.pdf]

## Table of contents

|                                                                                                      |    |
|------------------------------------------------------------------------------------------------------|----|
| Supplementary table 1. Search strategy.....                                                          | 2  |
| Supplementary figure 1. Flow chart of articles through the selection process .....                   | 4  |
| Supplementary table 2. Characteristics and baseline data of the individual studies .....             | 5  |
| Supplementary table 3. Quality assessment of studies included in the meta-analyses .....             | 6  |
| Supplementary figure 2. Forest plots of primary outcome variables with significant differences ..... | 7  |
| Supplementary table 4. Baseline characteristics .....                                                | 8  |
| Supplementary table 5. Sensitivity analysis for the comparison glyburide vs insulin .....            | 9  |
| Supplementary table 6. Sensitivity analysis for the comparison metformin vs insulin .....            | 10 |

## Supplementary table 1. Search strategy

### MEDLINE (PubMed)

#1 "Glyburide"[MeSH] 5415  
#2 "Metformin"[MeSH] 6142  
#3 oral diabetes agent\*[tiab] 12  
#4 oral antidiabetic agent\*[tiab] 658  
#5 oral hypoglycemic agent\*[tiab] 1406  
#6 metformin[tiab] 8079  
#7 glyburide[tiab] 1212  
#8 glibenclamide[tiab] 6634  
#9 glimepiride[tiab] 744  
#10 glipizide[tiab] 830  
#11 sulfonylurea[tiab] 4029  
#12 sulphonylurea[tiab] 1331  
#13 ((((((((((#1) OR #2) OR #3) OR #4) OR #5) OR #6) OR #7) OR #8) OR #9) OR #10) OR #11) OR #12 22521  
#14 "Pregnancy"[MeSH] 682623  
#15 "Diabetes, Gestational"[MeSH] 6200  
#16 pregnan\*[tiab] 353829  
#17 gestation\*[tiab] 138524  
#18 GDM[tiab] 2545  
#19 (((#14) OR #15) OR #16) OR #17) OR #18 797198  
#20 (#13) AND #19 909  
#21 (randomized controlled trial[pt] OR controlled clinical trial[pt] OR randomized[tiab] OR placebo[tiab] OR drug therapy[sh] OR randomly[tiab] OR trial[tiab] OR groups[tiab]) NOT (animals[mh] NOT (humans[mh] AND animals[mh])) 2713046  
#22 (#20) AND #21 567

### Cochrane Central Register of Controlled Trials (The Cochrane Library: Issue 4 of 12)

#1 MeSH descriptor: [Glyburide] explode all trees 473  
#2 MeSH descriptor: [Metformin] explode all trees 1334  
#3 oral diabetes agent\*.ti,ab 872  
#4 oral antidiabetic agent\*.ti,ab 159  
#5 oral hypoglycemic agent\*.ti,ab 552  
#6 metformin:ti,ab 1728  
#7 glyburide:ti,ab 194  
#8 glibenclamide:ti,ab 474  
#9 glimepiride:ti,ab 215  
#10 glipizide:ti,ab 179  
#11 sulfonylurea:ti,ab 475  
#12 sulphonylurea:ti,ab 258  
#13 #1 or #2 or #3 or #4 or #5 or #6 or #7 or #8 or #9 or #10 or #11 or #12 3450  
#14 MeSH descriptor: [Pregnancy] explode all trees 5310  
#15 MeSH descriptor: [Diabetes, Gestational] explode all trees 276  
#16 pregnan\*.ti,ab 13670  
#17 gestation\*.ti,ab 6261  
#18 GDM:ti,ab 118  
#19 #14 or #15 or #16 or #17 or #18 19383  
#20 #13 and #19 207 (164 in Clinical Trials)

### EMBASE (OVID Embase Classic+Embase)

1 exp glibenclamide/ (19156)  
2 exp metformin/ (29677)  
3 oral diabetes agent\*.ti,ab. (19)  
4 oral antidiabetic agent\*.ti,ab. (1112)  
5 oral hypoglycemic agent\*.ti,ab. (2069)  
6 metformin.ti,ab. (12825)  
7 glyburide.ti,ab. (1573)  
8 glibenclamide.ti,ab. (8721)  
9 glimepiride.ti,ab. (1186)  
10 glipizide.ti,ab. (1252)  
11 sulfonylurea.ti,ab. (5443)  
12 sulphonylurea.ti,ab. (2032)

13 1 or 2 or 3 or 4 or 5 or 6 or 7 or 8 or 9 or 10 or 11 or 12 (52632)  
14 exp pregnancy/ (652287)  
15 exp pregnancy diabetes mellitus/ (19212)  
16 pregnan\*.ti,ab. (480705)  
17 gestation\*.ti,ab. (179763)  
18 GDM.ti,ab. (3864)  
19 14 or 15 or 16 or 17 or 18 (856454)  
20 13 and 19 (2280)  
21 random:.tw. or placebo:.mp. or double-blind:.mp. (1050393)  
22 20 and 21 (540)

**Supplementary figure 1.** Flow chart of articles through the selection process

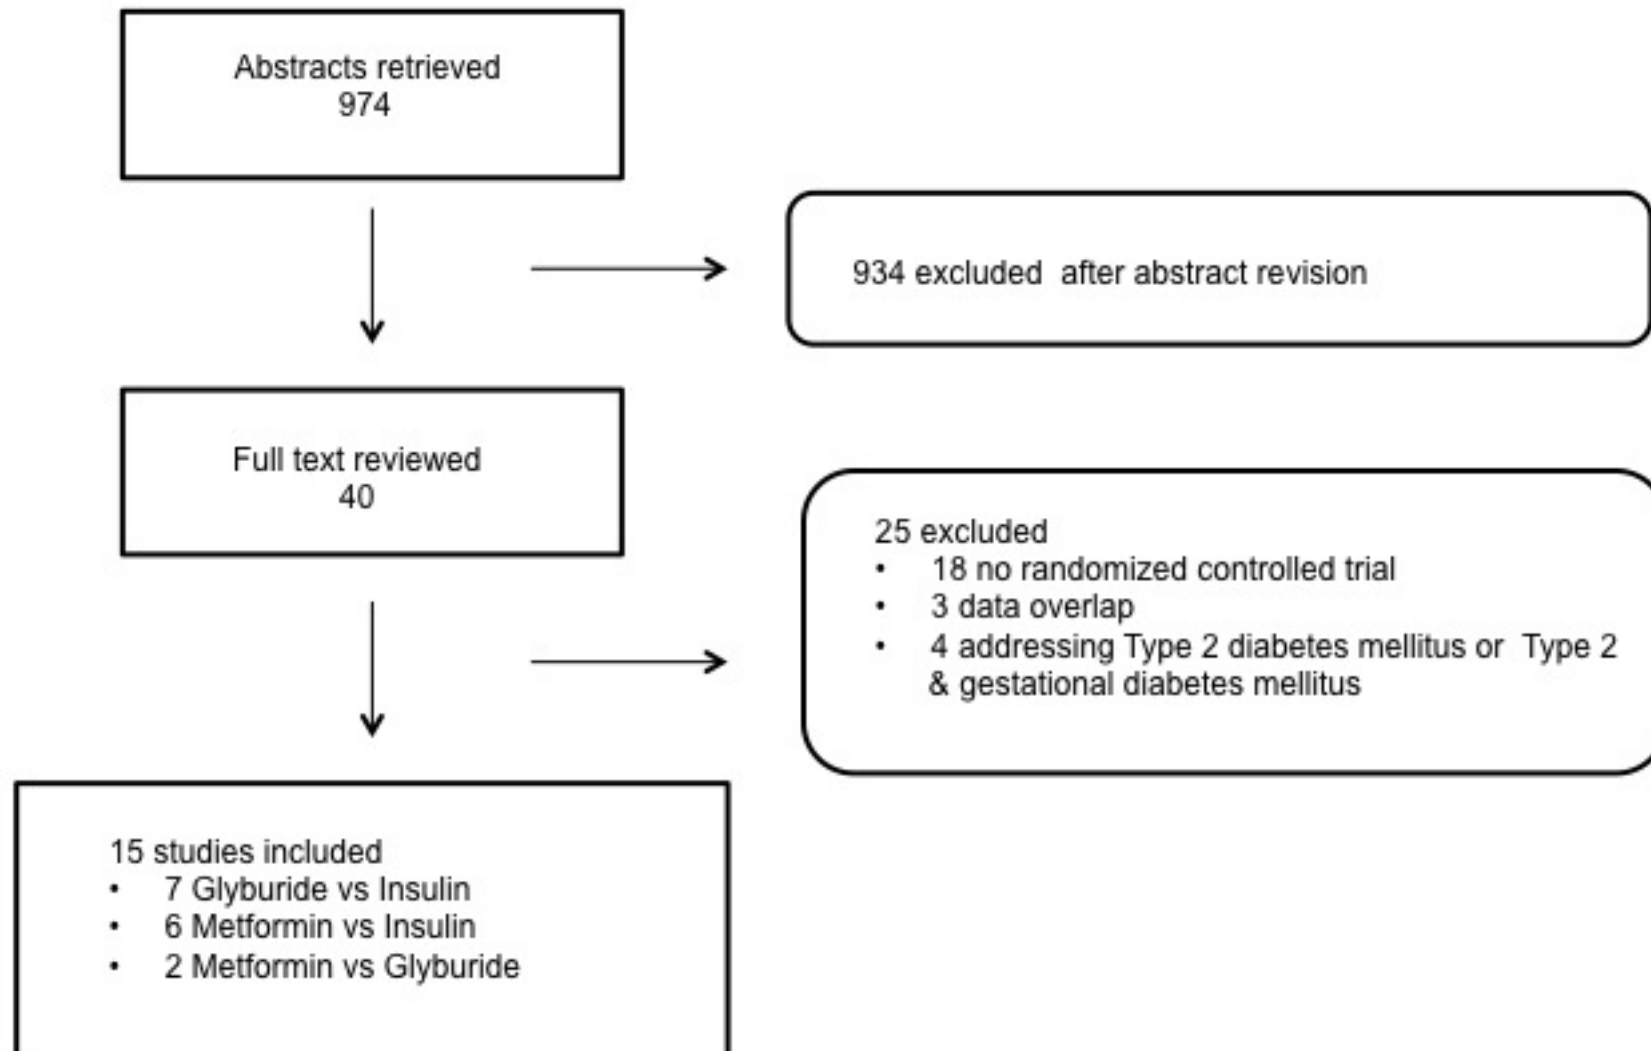

Supplementary table 2. Characteristics and baseline data of the individual studies included in the meta-analyses

| Glyburide vs Insulin              | Author/ Country                                   | GDM criteria                    | Blood glucose criteria for drug treatment (mmol/l) | Drug                                   | Number of patients     | Age (years)  | Prepregnancy BMI (Kg/m <sup>2</sup> ) | OGTT fasting/ 2h blood glucose (mmol/l) | GA at entry (weeks) | HbA <sub>1c</sub> at entry (%) |
|-----------------------------------|---------------------------------------------------|---------------------------------|----------------------------------------------------|----------------------------------------|------------------------|--------------|---------------------------------------|-----------------------------------------|---------------------|--------------------------------|
| Glyburide vs Insulin              | Langer 2000 <sup>2</sup><br>USA                   | C & C                           | ≥5.3 fasting<br>≥6.7 2h postprandial               | Insulin<br>Glyburide                   | 203<br>201             | 30.0<br>29.0 |                                       | 5.49/ 9.74<br>5.43/ 9.74                | 27.0<br>28.0        | 5.6<br>5.7                     |
|                                   | Silva 2007 <sup>20</sup><br>Brazil                | Local                           | ≥5.0 fasting<br>≥5.6 2h postprandial               | Insulin<br>Glyburide                   | 36<br>32               | 29.9<br>31.6 | 27.9<br>27.5                          |                                         | 25.6<br>26.6        |                                |
|                                   | Anjalakshi 2007 <sup>21</sup><br>India            | WHO                             | ≥6.7 2h postprandial                               | Insulin<br>Glyburide                   | 13<br>10               | 27.5<br>24.9 | 25.3<br>22.8                          |                                         | 22.6<br>22.5        | 5.75<br>5.48                   |
|                                   | Ogunyemi 2007 <sup>22</sup><br>USA                | Not given                       | Not given                                          | Insulin<br>Glyburide                   | 49<br>48               | Ns           | 30.8<br>32.0                          | 6.43/ 11.0<br>5.76*/ 9.94*              | 24.6<br>28.1*       | 7.5<br>5.8*                    |
|                                   | Lain 2009 <sup>3</sup><br>USA                     | C & C                           | >5.3 fasting<br>>6.7 2h postprandial               | Insulin<br>Glyburide                   | 41<br>41               | 31.2<br>32.2 | 30.9<br>33.4                          | 5.64/ 9.62<br>5.61/ 9.83                | 30.6<br>30.8        | 5.0<br>5.0                     |
|                                   | Mukhopadhyay2012 <sup>23</sup><br>India           | WHO                             | ≈5.0 fasting<br>≈6.7 2h postprandial               | Insulin<br>Glyburide                   | 30<br>30               | 26.0<br>26.3 | 23.0<br>23.7                          |                                         | 27.4<br>28.3        | 6.5<br>6.3                     |
|                                   | Tempe 2013 <sup>24</sup><br>India                 | C & C                           | ≥ 5.0 fasting<br>≥ 6.7 2h postprandial             | Insulin<br>Glyburide                   | 32<br>32               | 27.5<br>26.9 |                                       |                                         | 27.3<br>25.9        |                                |
|                                   | Moore 2007 <sup>25</sup><br>USA                   | NDDG                            | ≥ 5.8 fasting<br>≥ 6.7 2h postprandial             | Insulin<br>Metformin                   | 31<br>32               | 27.7<br>27.1 | 35.3<br>39.7*                         |                                         | 28.9<br>27.8        |                                |
| Metformin vs Insulin              | Rowan 2008 <sup>4</sup><br>Australia- New Zealand | ADIPS                           | >5.4 fasting<br>>6.7 2h postprandial               | Insulin<br>Metformin                   | 370<br>363             | 33.0<br>33.5 | 31.9<br>32.2                          | 5.71/ 9.40<br>5.70/ 9.70                | 30.1<br>30.2        | 5.8<br>5.7                     |
|                                   | Ijäs 2011 <sup>26</sup><br>Finland                | Local                           | >5.3 fasting<br>>6.7 1.5h postprandial             | Insulin<br>Metformin                   | 50<br>47               | 31.7<br>32.3 | 30.8<br>31.5                          | 5.40/ 8.10<br>5.60/ 8.20                | 30.0<br>30.0        | 5.9<br>5.9                     |
|                                   | Niromanesh 2012 <sup>27</sup><br>Iran             | C & C                           | >5.3 fasting<br>>6.7 2h postprandial               | Insulin<br>Metformin                   | 80<br>80               | 31.8<br>30.7 | 27.1<br>28.1                          | 5.95/ 9.58<br>5.82/ 9.14                | 28.6<br>28.7        | 5.6<br>5.7                     |
|                                   | Tertti 2013 <sup>28</sup><br>Finland              | Local                           | >5.5 fasting<br>>7.8 1h postprandial               | Insulin<br>Metformin                   | 107<br>110             | 32.1<br>31.9 | 28.9<br>29.4                          | 5.60/ 7.90<br>5.50/ 8.30                | 30.4<br>30.3        | 5.50<br>5.48                   |
|                                   | Spaulonci 2013 <sup>29</sup><br>Brazil            | C & C                           | >5.3 fasting<br>>6.7 2h postprandial               | Insulin<br>Metformin                   | 46<br>46               | 32.8<br>31.9 | 28.0<br>28.7                          |                                         | 32.1<br>32.2        | 5.93<br>5.90                   |
|                                   | Metformin vs Glyburide                            | Moore 2010 <sup>30</sup><br>USA | C & C                                              | ≥ 5.8 fasting<br>≥ 6.7 2h postprandial | Glyburide<br>Metformin | 74<br>75     | 29.6<br>31.0                          | 32.7<br>32.8                            |                     | 29.1<br>27.3                   |
| Silva 2012 <sup>5</sup><br>Brazil |                                                   | WHO                             | ≥ 5.0 fasting<br>≥ 6.7 1h postprandial             | Glyburide<br>Metformin                 | 96<br>104              | 31.2<br>32.6 | 28.6<br>28.7                          | 5.22/ 8.94<br>5.32/ 9.20                | 25.4<br>27.0        |                                |

GDM=Gestational Diabetes Mellitus; BMI=body mass index; OGTT=oral glucose tolerance test; HbA<sub>1c</sub>=glycated haemoglobin; GA=gestational age; C & C=Carpenter and Coustan; WHO=World Health Organization; Ns=non-significant; NDDG=National Diabetes Data Group; ADIPS=Australasian Diabetes In Pregnancy Society.

\* significant differences between groups

**Supplementary table 3. Quality assessment of studies included in the meta-analyses**

|                                       | <b>Author/<br/>Country</b>                        | <b>Randomization</b>                | <b>Allocation<br/>concealment</b> | <b>Blinding of patients<br/>and healthcare<br/>professionals</b> | <b>Published protocol /<br/>Selective outcomes<br/>reporting</b> | <b>Sample size<br/>calculation/<br/>Attrition rates</b> | <b>Intention<br/>to<br/>treat</b> | <b>Comparability in<br/>baseline<br/>characteristics</b>     | <b>Excluded in<br/>sensitivity analysis</b> |
|---------------------------------------|---------------------------------------------------|-------------------------------------|-----------------------------------|------------------------------------------------------------------|------------------------------------------------------------------|---------------------------------------------------------|-----------------------------------|--------------------------------------------------------------|---------------------------------------------|
| <b>Glyburide<br/>vs<br/>Insulin</b>   | Langer 2000 <sup>2</sup><br>USA                   | Computer generated                  | Sealed<br>envelopes               | Open label                                                       | Not found<br>All but SGA                                         | Not described<br>0 vs 0%                                | Yes                               | Balanced                                                     | No                                          |
|                                       | Silva 2007 <sup>20</sup><br>Brazil                | Not described                       | Envelopes                         | Open label                                                       | Not found<br>All but Apgar                                       | Described<br>5.56% total                                | Yes                               | Balanced                                                     | No                                          |
|                                       | Anjalakshi 2007 <sup>21</sup><br>India            | Not described                       | Not described                     | Open label                                                       | Not found<br>Not predefined                                      | Not described<br>23.1 vs 0%                             | Yes                               | Balanced                                                     | Yes                                         |
|                                       | Ogunyemi 2007 <sup>22</sup><br>USA                | Computer generated                  | Sealed<br>envelopes               | Open label                                                       | Not found<br>No                                                  | Not described<br>10.4 vs 8.2%                           | Yes                               | Unbalanced                                                   | No                                          |
|                                       | Lain 2009 <sup>3</sup><br>USA                     | Random permuted block               | Sealed<br>envelopes               | Open label                                                       | Not found<br>No                                                  | Described<br>16.3 vs 18.0%                              | Yes<br>Stated                     | Balanced                                                     | No                                          |
|                                       | Mukhopadhyay2012 <sup>23</sup><br>India           | Table of random<br>numbers          | Not described                     | Open label                                                       | Not found<br>No                                                  | Not described<br>0 vs 0%                                | Yes                               | Unbalanced                                                   | No                                          |
|                                       | Tempe 2013 <sup>24</sup><br>India                 | Not described                       | Not described                     | Open label                                                       | Not found<br>All but delivery type                               | Not described<br>11.1 vs 8.6%                           | Yes                               | Balanced                                                     | No                                          |
| <b>Metformin<br/>vs<br/>Insulin</b>   | Moore 2007 <sup>25</sup><br>USA                   | Computer generated                  | Sealed<br>envelopes               | Open label                                                       | Not found<br>No                                                  | Described<br>0 vs 0%                                    | Yes                               | Unbalanced<br>Height >1.60 Metformin<br>Height <1.40 Insulin | Yes                                         |
|                                       | Rowan 2008 <sup>4</sup><br>Australia- New Zealand | Block size 4, stratified by<br>site | Not described                     | Open label                                                       | Published<br>No                                                  | Described<br>2.7 vs 2.11%                               | Yes<br>Stated                     | Balanced                                                     | No                                          |
|                                       | Ijäs 2011 <sup>26</sup><br>Finland                | Generated manually                  | Sealed<br>envelopes               | Open label                                                       | Published<br>No                                                  | Described<br>6 vs 0%                                    | Yes                               | Balanced                                                     | No                                          |
|                                       | Niromanesh 2012 <sup>27</sup><br>Iran             | Computer generated                  | Sealed<br>envelopes               | Single blind<br>(Obstetrician)                                   | Published<br>No                                                  | Described<br>7 vs 7%                                    | Yes                               | Balanced                                                     | No                                          |
|                                       | Tertti 2013 <sup>28</sup><br>Finland              | Not described                       | Sealed<br>envelopes               | Open label                                                       | Published<br>No                                                  | Described<br>0.9 vs 2.7%                                | Yes                               | Balanced                                                     | No                                          |
|                                       | Spaulonci 2013 <sup>29</sup><br>Brazil            | Computer generated                  | Not described                     | Open label                                                       | Published<br>No                                                  | Described<br>2.1 vs 2.1 %                               | Yes<br>Stated                     | Balanced                                                     | No                                          |
| <b>Metformin<br/>vs<br/>Glyburide</b> | Moore 2010 <sup>30</sup><br>USA                   | Computer generated                  | Sealed<br>envelopes               | Open label                                                       | Published<br>No                                                  | Described<br>0 vs 0%                                    | Yes                               | Balanced                                                     | No                                          |
|                                       | Silva 2012 <sup>5</sup><br>Brazil                 | Computer generated                  | Brown<br>envelopes                | Open label                                                       | Not published<br>All but macrosomia                              | Not described<br>0 vs 0%                                | Yes                               | Balanced                                                     | No                                          |

SGA= Small-for-gestational age newborns

**Supplementary figure 2.** Forest plot of primary outcome variables with significant differences\* in women with gestational diabetes mellitus requiring drug treatment

**A) Glyburide vs Insulin**

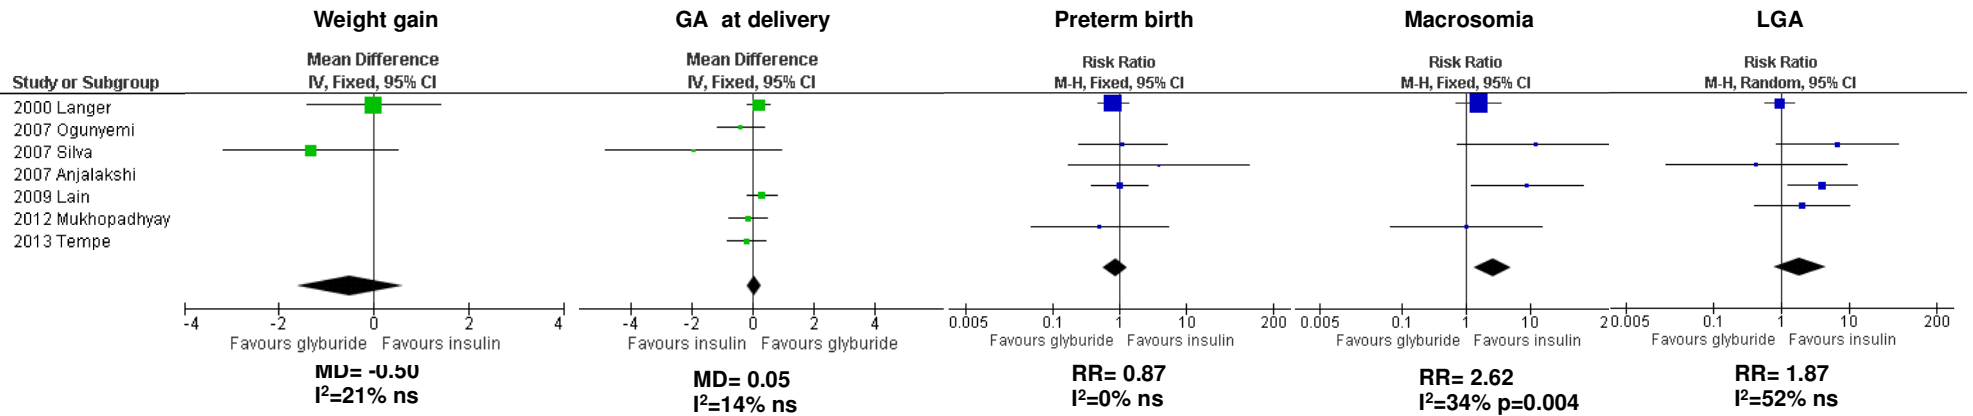

**B) Metformin vs Insulin**

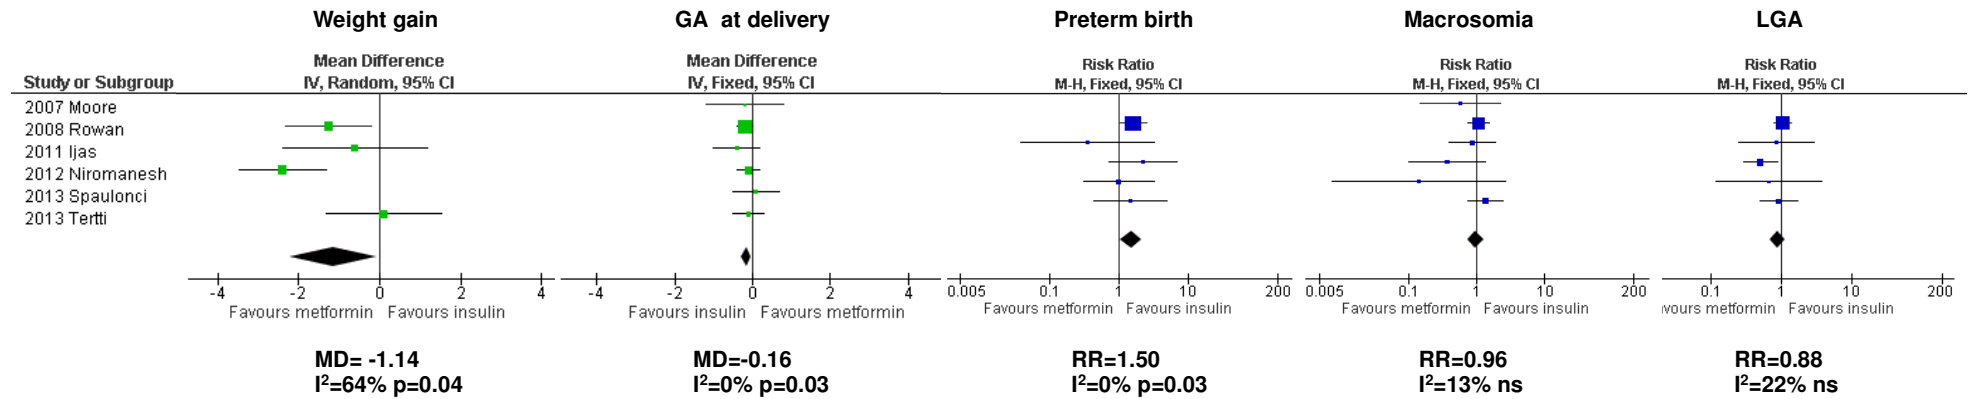

**C) Metformin vs Glyburide**

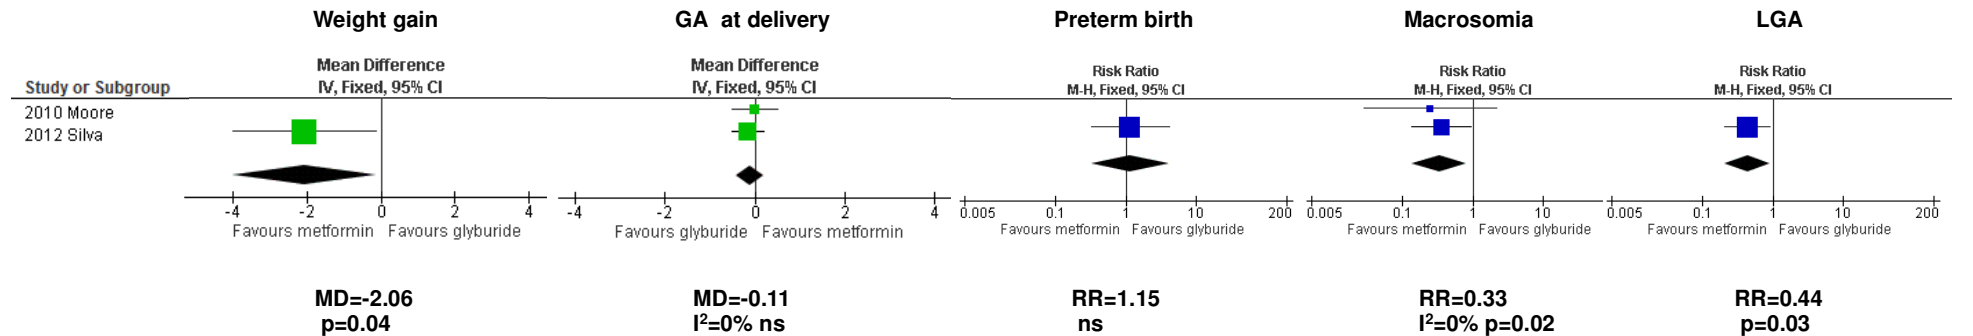

\*Forest plots for birthweight and any neonatal hypoglycemia are depicted in figures 1 and 2 of the main text

**Supplementary table 4.** Baseline patient characteristics in randomized controlled trials comparing glyburide or metformin vs insulin or vs each other in women with gestational diabetes mellitus

|                        |                                           | Number of studies | Number of patients treated with glyburide | Number of patients treated with insulin | Mean difference           | Relative risk           | P    | I <sup>2</sup> |
|------------------------|-------------------------------------------|-------------------|-------------------------------------------|-----------------------------------------|---------------------------|-------------------------|------|----------------|
| Glyburide vs Insulin   | Maternal age (years)                      | 6                 | 346                                       | 355                                     | -0.32<br>(-1.09 to 0.45)  | -                       | 0.46 | 24             |
|                        | Prepregnancy BMI (Kg/m <sup>2</sup> )     | 5                 | 161                                       | 169                                     | 0.43<br>(-0.64 to 1.50)   | -                       | 0.43 | 6              |
|                        | Gestational age at entry (weeks)          | 7                 | 394                                       | 404                                     | 0.59<br>(-0.03 to 1.20)   | -                       | 0.06 | 22             |
|                        | Fasting plasma glucose at OGTT (mmol/l)   | 3                 | 290                                       | 293                                     | -0.21*<br>(-0.53 to 0.12) | -                       | 0.21 | 71             |
|                        | 2h postprandial glucose at OGTT (mmol/l)  | 3                 | 290                                       | 293                                     | -0.21*<br>(-0.83 to 0.41) | -                       | 0.50 | 62             |
|                        | HbA <sub>1c</sub> at entry (%)            | 5                 | 330                                       | 336                                     | -0.38*<br>(-0.88 to 0.11) | -                       | 0.13 | 90             |
|                        | Number of prior pregnancies (per patient) | 1                 | 32                                        | 36                                      | -0.40<br>(-1.20 to 0.40)  | -                       | 0.33 | -              |
|                        | % of prior pregnancies                    | 2                 | 73                                        | 73                                      | -                         | 1.17*<br>(0.38 to 3.63) | 0.79 | 81             |
| Metformin vs Insulin   | Maternal age (years)                      | 6                 | 678                                       | 684                                     | 0.01<br>(-0.55 to 0.58)   | -                       | 0.97 | 0              |
|                        | Prepregnancy BMI (Kg/m <sup>2</sup> )     | 6                 | 596                                       | 618                                     | 0.78<br>(0.15 to 1.41)    | -                       | 0.01 | 0              |
|                        | Gestational age at entry (weeks)          | 6                 | 678                                       | 684                                     | 0.01<br>(-0.31 to 0.32)   | -                       | 0.97 | 0              |
|                        | Fasting plasma glucose at OGTT (mmol/l)   | 4                 | 558                                       | 567                                     | -0.0<br>(-0.15 to 0.02)   | -                       | 0.12 | 31             |
|                        | 2h postprandial glucose at OGTT (mmol/l)  | 4                 | 557                                       | 556                                     | 0.11*<br>(-0.26 to 0.49)  | -                       | 0.55 | 58             |
|                        | HbA <sub>1c</sub> at entry (%)            | 5                 | 628                                       | 602                                     | -0.04<br>(-0.10 to 0.02)  | -                       | 0.19 | 0              |
|                        | Number of prior pregnancies (per patient) | 2                 | 79                                        | 81                                      | -0.34<br>(-1.01 to 0.34)  | -                       | 0.33 | 38             |
|                        | % of prior pregnancies                    | 5                 | 646                                       | 653                                     | -                         | 0.94<br>(0.83 to 1.07)  | 0.34 | 0              |
| Metformin vs Glyburide | Maternal age (years)                      | 2                 | 179                                       | 170                                     | 1.36<br>(0.07 to 2.64)    | -                       | 0.04 | 0              |
|                        | Prepregnancy BMI (Kg/m <sup>2</sup> )     | 2                 | 179                                       | 170                                     | 0.09<br>(-1.16 to 1.33)   | -                       | 0.89 | 0              |
|                        | Gestational age at entry (weeks)          | 2                 | 179                                       | 170                                     | -0.63*<br>(-2.91 to 1.64) | -                       | 0.58 | 65             |
|                        | Fasting plasma glucose at OGTT (mmol/l)   | 1                 | 104                                       | 96                                      | 0.10<br>(-0.19 to 0.39)   | -                       | 0.49 | -              |
|                        | 2h postprandial glucose at OGTT (mmol/l)  | 1                 | 104                                       | 96                                      | 0.26<br>(-0.05 to 0.57)   | -                       | 0.10 | -              |
|                        | HbA <sub>1c</sub> at entry (%)            | 0                 | -                                         | -                                       | -                         | -                       | -    | -              |
|                        | Number of prior pregnancies (per patient) | 1                 | 104                                       | 96                                      | 0.37<br>(0.20 to 0.72)    | -                       | 0.04 | -              |
|                        | % of prior pregnancies                    | 0                 | -                                         | -                                       | -                         | -                       | -    | -              |

I<sup>2</sup>=Heterogeneity; BMI=Body mass index; OGTT=Oral glucose tolerance test; HbA<sub>1c</sub>=Glycated haemoglobin

\* Estimated using a random effects model because I<sup>2</sup>>50%,



**Supplementary table 5.** Meta-analysis of randomized controlled trials comparing glyburide vs insulin in women with gestational diabetes mellitus· Sensitivity analysis

|                    |                                                | Number of studies | Number of patients treated with glyburide | Number of patients treated with insulin | Mean difference          | Relative risk             | P     | I <sup>2</sup> |
|--------------------|------------------------------------------------|-------------------|-------------------------------------------|-----------------------------------------|--------------------------|---------------------------|-------|----------------|
| Primary outcomes   | End 3rd trimester HbA <sub>1c</sub> (%)        | 2                 | 231                                       | 233                                     | 0.00*<br>(-0.24 to 0.25) | -                         | 0.99  | 63             |
|                    | Severe maternal hypoglycaemia (%)              | 4                 | 277                                       | 278                                     | -                        | Not estimable<br>(0 vs 0) | -     | -              |
|                    | Preeclampsia (%)                               | 3                 | 265                                       | 271                                     | -                        | 0.93<br>(0.51 to 1.68)    | 0.80  | 19             |
|                    | Weight gain (kg)                               | 2                 | 233                                       | 239                                     | -0.50<br>(-1.62 to 0.62) | -                         | 0.38  | 21             |
|                    | Caesarean section (%)                          | 3                 | 276                                       | 284                                     | -                        | 0.86<br>(0.68 to 1.10)    | 0.24  | 0              |
|                    | Gestational age at delivery (weeks)            | 6                 | 384                                       | 391                                     | 0.05<br>(-0.18 to 0.28)  | -                         | 0.69  | 14             |
|                    | Preterm birth (%)                              | 4                 | 306                                       | 312                                     | -                        | 0.84<br>(0.55 to 1.29)    | 0.42  | 0              |
|                    | Birth weight (g)                               | 6                 | 384                                       | 391                                     | 108<br>(33.2 to 183)     | -                         | 0.005 | 6              |
|                    | Macrosomia (%)                                 | 5                 | 336                                       | 342                                     | -                        | 2.62<br>(1.35 to 5.08)    | 0.004 | 34             |
|                    | Large-for-gestational age (%)                  | 4                 | 304                                       | 310                                     | -                        | 2.15*<br>(0.80 to 5.77)   | 0.13  | 62             |
|                    | Small-for-gestational age (%)                  | 3                 | 274                                       | 280                                     | -                        | 0.97<br>(0.51 to 1.85)    | 0.92  | 37             |
|                    | Any neonatal hypoglycaemia (%)                 | 6                 | 377                                       | 387                                     | -                        | 2.04<br>(1.30 to 3.20)    | 0.002 | 0              |
|                    | Perinatal mortality (%)                        | 3                 | 277                                       | 287                                     | -                        | 1.45<br>(0.29 to 7.21)    | 0.65  | 0              |
| Secondary outcomes | Fasting blood glucose (mmol/l)                 | 3                 | 274                                       | 280                                     | 0.06<br>(-0.06 to 0.19)  | -                         | 0.33  | 0              |
|                    | Postprandial blood glucose (mmol/l)            | 3                 | 274                                       | 280                                     | 0.07<br>(-0.11 to 0.25)  | -                         | 0.46  | 0              |
|                    | Weight gain since entry (kg)                   | 0                 | -                                         | -                                       | -                        | -                         | -     | -              |
|                    | Pregnancy-induced hypertension (%)             | 0                 | -                                         | -                                       | -                        | -                         | -     | -              |
|                    | Induction (%)                                  | 0                 | -                                         | -                                       | -                        | -                         | -     | -              |
|                    | Cord C-peptide (nmol/l)                        | 1                 | 31                                        | 28                                      | 0.07<br>(-0.14 to 0.27)  | -                         | 0.53  | -              |
|                    | Cord insulin (pmol/l)                          | 2                 | 232                                       | 231                                     | -3.68<br>(-24.5 to 17.2) | -                         | 0.73  | 0              |
|                    | 1 min Apgar <7 (%)                             | 0                 | -                                         | -                                       | -                        | -                         | -     | -              |
|                    | 5 min Apgar <7 (%)                             | 0                 | -                                         | -                                       | -                        | -                         | -     | -              |
|                    | Obstetric trauma (%)                           | 0                 | -                                         | -                                       | -                        | -                         | -     | -              |
|                    | Severe neonatal hypoglycaemia <sup>†</sup> (%) | 2                 | 72                                        | 77                                      | -                        | 5.31<br>(0.63 to 44.9)    | 0.13  | 0              |
|                    | Neonatal jaundice (%)                          | 3                 | 262                                       | 265                                     | -                        | 1.72<br>(0.75 to 3.94)    | 0.20  | 0              |
|                    | Neonatal respiratory distress syndrome (%)     | 2                 | 231                                       | 233                                     | -                        | 0.61<br>(0.19 to 1.92)    | 0.39  | 0              |
|                    | Stillbirth (%)                                 | 4                 | 307                                       | 313                                     | -                        | 1.32<br>(0.33 to 5.22)    | 0.70  | 0              |
|                    | Neonatal mortality (%)                         | 2                 | 244                                       | 251                                     | -                        | 1.01<br>(0.06 to 16.0)    | 0.99  | -              |
| NICU admission (%) | 4                                              | 302               | 306                                       | -                                       | 0.97<br>(0.56 to 1.69)   | 0.92                      | 0     |                |

I<sup>2</sup>=Heterogeneity; HbA<sub>1c</sub>= Glycated haemoglobin

\* Estimated using a random effects model because I<sup>2</sup>>50%

† Defined by authors or requiring intravenous glucose and/or NICU admittance

**Supplementary table 6.** Meta-analysis of randomized controlled trials comparing metformin vs insulin in women with gestational diabetes. Sensitivity analysis

|                                                |                                         | Number of studies              | Number of patients treated with metformin | Number of patients treated with insulin | Mean difference            | Relative risk             | P      | I <sup>2</sup> |
|------------------------------------------------|-----------------------------------------|--------------------------------|-------------------------------------------|-----------------------------------------|----------------------------|---------------------------|--------|----------------|
| Primary outcomes                               | End 3rd trimester HbA <sub>1c</sub> (%) | 4                              | 508                                       | 533                                     | -0.04<br>(-0.09 to 0.02)   | -                         | 0.21   | 24             |
|                                                | Severe maternal hypoglycaemia (%)       | 3                              | 236                                       | 237                                     | Not estimable<br>(0 vs 0)  | -                         | -      | -              |
|                                                | Preeclampsia (%)                        | 5                              | 646                                       | 653                                     | -                          | 0.82<br>(0.56 to 1.20)    | 0.32   | 0              |
|                                                | Weight gain (kg)                        | 4                              | 468                                       | 505                                     | -1.14*<br>(-2.22 to -0.06) | -                         | 0.04   | 64             |
|                                                | Caesarean section (%)                   | 5                              | 646                                       | 653                                     | -                          | 0.99<br>(0.86 to 1.14)    | 0.86   | 23             |
|                                                | Gestational age at delivery (weeks)     | 5                              | 646                                       | 653                                     | -0.16<br>(-0.30 to -0.02)  | -                         | .03    | 0              |
|                                                | Preterm birth (%)                       | 5                              | 646                                       | 653                                     | -                          | 1.50<br>(1.04 to 2.16)    | 0.03   | 0              |
|                                                | Birth weight (g)                        | 5                              | 646                                       | 653                                     | -31.0<br>(-86.8 to 24.8)   | -                         | 0.28   | 23             |
|                                                | Macrosomia (%)                          | 5                              | 646                                       | 653                                     | -                          | 0.99<br>(0.75 to 1.31)    | 0.93   | 22             |
|                                                | Large-for-gestational age (%)           | 5                              | 646                                       | 653                                     | -                          | 0.88<br>(0.69 to 1.11)    | 0.28   | 22             |
|                                                | Small-for-gestational age (%)           | 5                              | 646                                       | 653                                     | -                          | 0.88<br>(0.58 to 1.33)    | 0.53   | 0              |
|                                                | Any neonatal hypoglycaemia (%)          | 5                              | 645                                       | 653                                     | -                          | 0.79<br>(0.61 to 1.03)    | 0.09   | 0              |
|                                                | Perinatal mortality (%)                 | 4                              | 600                                       | 607                                     | -                          | 1.00<br>(0.14 to 7.12)    | 0.99   | 0              |
|                                                | Secondary outcomes                      | Fasting blood glucose (mmol/l) | 3                                         | 489                                     | 496                        | 0.06<br>(-0.01 to 0.13)   | -      | 0.12           |
| Postprandial blood glucose (mmol/l)            |                                         | 3                              | 489                                       | 496                                     | -0.12*<br>(-0.28 to 0.04)  | -                         | 00.14  | 59             |
| Weight gain since entry (kg)                   |                                         | 4                              | 565                                       | 533                                     | -1.23*<br>(-1.72 to -0.73) | -                         | <0.001 | 61             |
| Pregnancy-induced hypertension (%)             |                                         | 3                              | 553                                       | 557                                     | -                          | 0.53<br>(0.31 to 0.90)    | 0.02   | 0              |
| Induction (%)                                  |                                         | 3                              | 520                                       | 527                                     | -                          | 0.91<br>(0.81 to 1.02)    | 0.11   | 46             |
| Cord C-peptide (nmol/l)                        |                                         | 0                              | -                                         | -                                       | -                          | -                         | -      | -              |
| Cord insulin (pmol/l)                          |                                         | 1                              | 220                                       | 234                                     | 7.64<br>(-92.7 to 108)     | -                         | 0.88   | -              |
| 1 min Apgar <7 (%)                             |                                         | 0                              | -                                         | -                                       | -                          | -                         | -      | -              |
| 5 min Apgar <7 (%)                             |                                         | 1                              | 363                                       | 370                                     | -                          | 3.06<br>(0.32 to 29.3)    | 0.33   | -              |
| Obstetric trauma (%)                           |                                         | 2                              | 472                                       | 477                                     | -                          | 0.86<br>(0.45 to 1.63)    | 0.64   | 2              |
| Severe neonatal hypoglycaemia <sup>†</sup> (%) |                                         | 3                              | 519                                       | 527                                     | -                          | 0.62<br>(0.42 to 0.94)    | 0.02   | 48             |
| Neonatal jaundice (%)                          |                                         | 5                              | 645                                       | 653                                     | -                          | 0.93<br>(0.67 to 1.28)    | 0.66   | 0              |
| Neonatal respiratory distress syndrome (%)     |                                         | 4                              | 598                                       | 603                                     | -                          | 1.21<br>(0.62 to 2.37)    | 0.57   | 0              |
| Stillbirth (%)                                 |                                         | 4                              | 600                                       | 607                                     | -                          | 1.00<br>(0.14 to 7.12)    | 0.99   | 0              |
| Neonatal mortality (%)                         |                                         | 4                              | 599                                       | 606                                     | -                          | Not estimable<br>(0 vs 0) | -      | -              |
| NICU admission (%)                             |                                         | 4                              | 599                                       | 607                                     | -                          | 0.89<br>(0.71 to 1.10)    | 0.28   | 0              |

I<sup>2</sup>=Heterogeneity; HbA<sub>1c</sub>=Glycated haemoglobin

\* Estimated using a random effects model because I<sup>2</sup>>50%

† Defined by authors or requiring intravenous glucose and/or NICU admittance
